# Supplementary material
Source: PubMed Central journal article supplement (PMC6355102)
Supplement: bty064_suppmatv5.pdf [file bty064_suppmatv5.pdf]

Appendix and Supplementary Material for Testing multiple  
biological mediators simultaneously: Controlling FWER and  
FDR

Joshua N. Sampson<sup>1</sup>, Simina M. Boca<sup>2</sup>, Steven C. Moore<sup>3</sup>, and Ruth Heller<sup>4</sup>

<sup>1</sup>Division of Cancer Epidemiology and Genetics, National Cancer Institute,  
Rockville, MD, US, joshua.sampson@nih.gov

<sup>2</sup>Innovation Center for Biomedical Informatics, Georgetown University,  
Washington, DC, US, smb310@georgetown.edu

<sup>3</sup>Division of Cancer Epidemiology and Genetics, National Cancer Institute,  
Rockville, MD, US, steven.moore@nih.gov

<sup>4</sup>Department of Statistics and Operations Research, Tel Aviv University, Tel Aviv,  
Il, ruheller@post.tau.ac.il

In the appendix, we present the proofs for theorems in our paper. In section I of the “supplementary material”, we report the results from our simulations exploring power and FWER when, conditioned on the exposure, the biomarkers are correlated. In these simulations,  $\Sigma_0$  is block diagonal, with blocks of size 5 ( $m=110$ ) or 20 ( $m=1010$ ), and let the off-diagonal elements be either 0.5 or 0.9. In section II of the “supplementary material”, we report the results from our simulations exploring FDR.

## Appendix

### Logistic vs Probit Regression

In the main paper, when dealing with a binary outcome, we purposely chose to use the probit link instead of the logit link for one key reason. For the probit link, the following two models (equations 1 and 2) are consistent:

$$Y_i^\dagger = \gamma_0 + \gamma_E E_i + \gamma_j M_{ij} + \epsilon_{Y_{ij}} \quad (1)$$

$$Y_i^\dagger = \gamma_0 + \gamma_E E_i + \sum_j \gamma_j^* M_{ij} + \epsilon_{Y_{ij}}^* \quad (2)$$

with  $Y_i = 1(Y_i^\dagger > 0)$ . In contrast, for the logistic link, the following two models (equations 3 and equations 4) are unlikely to be consistent:

$$\text{Logit}(E[Y_i]) = \gamma_0 + \gamma_E E_i + \gamma_j M_{ij} + \epsilon_{Y_{ij}} \quad (3)$$

$$\text{Logit}(E[Y_i]) = \gamma_0 + \gamma_E E_i + \sum_j \gamma_j^* M_{ij} + \epsilon_{Y_{ij}}^* \quad (4)$$

If we truly believed equation 4 was true, then we could not necessary defend using equation 3, nor could we necessarily defend that  $\gamma_j = 0$  is equivalent to  $Y_i \perp\!\!\!\perp M_{ij} | E_i$ . However, in practice, we expect our MCP’s to work when using logistic regression. First, we note that if the biomarker effects (i.e.  $\gamma_j^*$ ) are small, then equation 3 is approximately true and all is well. Second, we could define  $\gamma_j^\dagger$  to be the value that maximizes the log-likelihood when equation 3 is assumed to be true.

Then, we could just redefine  $H_{02}^j$  to be  $H_{02}^{j\dagger} : \gamma_j^\dagger = 0$ . We admittedly did not explore the conditions for when  $H_{02}^{j\dagger} = 0$  is equivalent to  $Y_i \perp\!\!\!\perp M_{ij} | E_i$ , but note, in some sense, this equivalence is an implied assumption when interpreting logistic parameters in practice.

## Proofs of Family-Wise Error Rate and False Discovery Rate

Let  $\Theta_E = \{\beta_1, \dots, \beta_m\}$  corresponding to equation 4 from the main paper,  $\Theta_Y = \{\gamma_1, \dots, \gamma_m\}$  corresponding to equation 5 or equation 8 from the main paper, and let  $\Theta = \{\Theta_E, \Theta_Y\}$ . Let  $\hat{\Theta}_E, \hat{\Theta}_M$ , and  $\hat{\Theta}$  be the corresponding MLE. Let  $\hat{\sigma}_{\beta_j}^2$  be a consistent estimate of the variance  $var(\sqrt{n}(\hat{\beta}_j - \beta_j))$ ,  $Z_{1j} = \sqrt{n}\hat{\beta}_j/\hat{\sigma}_{\beta_j}$ , and  $P_{1j} = \Phi(-|Z_{1j}|)$ . Similarly, let  $\hat{\sigma}_{\gamma_j}^2$  be a consistent estimate of the variance  $var(\sqrt{n}(\hat{\gamma}_j - \gamma_j))$ ,  $Z_{2j} = \sqrt{n}\hat{\gamma}_j/\hat{\sigma}_{\gamma_j}$ , and  $P_{2j} = \Phi(-|Z_{2j}|)$ . We define four sets of biomarkers,  $\omega_{00}, \omega_{01}, \omega_{10}, \omega_{11}$  where  $\omega_{xy} = \{j : sign(|\beta_j|) = x, sign(|\gamma_j|) = y\}$ . We let  $\omega_{.0} = \omega_{00} \cup \omega_{10}$ ,  $\omega_{.1} = \omega_{01} \cup \omega_{11}$ ,  $\omega_{\emptyset} = \omega_{00} \cup \omega_{01} \cup \omega_{10}$ , and  $S_{xy} = C(\omega_{xy})$ . Furthermore, we define a new variable and let  $W=1$  if  $P_{1j} < t_1 \forall j \in \omega_{.1}$  and  $P_{2j} < t_2 \forall j \in \omega_{.1}$ , 0 otherwise.

The key to the proof of FWER is that, asymptotically,  $P_{1j'} \perp\!\!\!\perp P_{2j^\dagger}$  for  $j' \in \omega_{.0}$  and  $j^\dagger \in \omega_{.0}$  by assumption A1. To see this independence, note that  $P_{1j'} \perp\!\!\!\perp P_{2j^\dagger}$  if  $Z_{1j'} \perp\!\!\!\perp Z_{2j^\dagger}$ . Furthermore,  $Z_{1j'}$  and  $Z_{2j^\dagger}$  are, asymptotically, normal random variables so  $Z_{1j'} \perp\!\!\!\perp Z_{2j^\dagger}$  if  $cov(Z_{1j'}, Z_{2j^\dagger}) = E[Z_{1j'} \times Z_{2j^\dagger}] = 0$ . Finally, we know that  $E[E[Z_{1j'} \times Z_{2j^\dagger} | M_{.j'}, E.]] = E[Z_{1j'} \times 0 | M_{.j'}, E.]$  by assumption 1.

**Theorem 1.** *For  $MCP_S(\cdot | t_1, t_2, \alpha)$ , if A1 holds and  $\{M_{i1}, \dots, M_{im}, Y_i\}$  follow equations 4 and either 5 or 8, then  $\lim_{n \rightarrow \infty} FWER \leq \alpha$*

*Proof.* Clearly,  $Pr(W = 1) \rightarrow 1$ . Let  $\alpha^* = \alpha/2$ .

$FWER \leq$

$$E\left[\sum_{j \in \omega_{\emptyset}} 1(P_{1j} < \min(t_1, \alpha^*/S_2), P_{2j} < \min(t_2, \alpha^*/S_1))\right] =$$

$$E\left[\sum_{j \in \omega_{\emptyset}} 1(P_{1j} < \min(t_1, \alpha^*/S_2), P_{2j} < \min(t_2, \alpha^*/S_1)) | W = 1\right] P_W +$$

$$E\left[\sum_{j \in \omega_{\emptyset}} 1(P_{1j} < \min(t_1, \alpha^*/S_2), P_{2j} < \min(t_2, \alpha^*/S_1)) | W \neq 1\right] Q_W$$

with  $P_W \equiv 1 - Q_W \equiv Pr(W = 1)$ . Therefore, for  $n$  large enough

$$FWER <$$

$$E\left[\sum_{j \in \omega_\emptyset} 1(P_{1j} < \min(t_1, \alpha^*/S_2), P_{2j} < \min(t_2, \alpha^*/S_1)) | W = 1\right] + \epsilon$$

Next, we split  $FWER_1 \equiv E[\sum_{j \in \omega_\emptyset} 1(P_{1j} < \min(t_1, \alpha^*/S_2), P_{2j} < \min(t_2, \alpha^*/S_1)) | W = 1]$  into three components

$$FWER_1 =$$

$$E\left[\sum_{j \in \omega_{01}} 1(P_{1j} < \min(t_1, \alpha^*/S_2), P_{2j} < \min(t_2, \alpha^*/S_1)) | W = 1\right] +$$

$$E\left[\sum_{j \in \omega_{10}} 1(P_{1j} < \min(t_1, \alpha^*/S_2), P_{2j} < \min(t_2, \alpha^*/S_1)) | W = 1\right] +$$

$$E\left[\sum_{j \in \omega_{00}} 1(P_{1j} < \min(t_1, \alpha^*/S_2), P_{2j} < \min(t_2, \alpha^*/S_1)) | W = 1\right]$$

For set  $\omega_{01}$  (and similarly for  $\omega_{10}$ ),

$$E\left[\sum_{j \in \omega_{01}} 1(P_{1j} < \min(t_1, \alpha^*/S_2), P_{2j} < \min(t_2, \alpha^*/S_1)) | W = 1\right] \leq$$

$$E\left[\sum_{j \in \omega_{01}} 1(P_{1j} < \alpha^*/S_2) | W = 1\right] \rightarrow E[S_{01}\alpha^*/S_2 | W = 1]$$

For set  $\omega_{00}$ ,

$$E\left[\sum_{j \in \omega_{00}} 1(P_{1j} < \min(t_1, \alpha^*/S_2)1(P_{2j} < \min(t_2, \alpha^*/S_1)) | W = 1\right] \leq$$

$$E\left[\sum_{j \in \omega_{00}, P_{2j} < t_2} 1(P_{1j} < \alpha^*/S_2) | W = 1\right] \rightarrow$$

$$E[(S_2 - S_{01})\alpha^*/S_2 | W = 1]$$

The final convergence in each step relies on  $P_{1j'} \perp P_{2j^\dagger}$  for  $j' \in \omega_0$ . and  $j^\dagger \in \omega_0$  and  $n$  being large

enough so that the p-values for all non-null hypotheses are below the stated threshold. Combined, we see that  $FWER \leq E[S_{01}\alpha^*/S_2 + S_{10}\alpha^*/S_1 + (S_2 - S_{01})\alpha^*/S_2 | W = 1] \leq 2\alpha^* = \alpha$  so  $FWER < \alpha + \epsilon$ .

□

For discussing FDR, we require an assumption of conditional independence, which results in, asymptotically,  $P_{1j'} \perp\!\!\!\perp P_{2j^\dagger}$  for  $j' \in \omega_0$  and  $j^\dagger \in \omega_0$ . In practice, we have found that this procedure is robust to deviations from this assumption.

**Assumption A2:**  $M_{ij'} \perp\!\!\!\perp M_{j^\dagger} | E_i \forall j', j^\dagger \in \{1, \dots, m\}$

It is straight forward to show that assumption A2 implies that, asymptotically,  $P_{1j} \perp\!\!\!\perp \{P_{11}, \dots, P_{1(j-1)}, P_{1(j+1)}, \dots, P_{1m}\} | E, S_2$  and  $P_{2j} \perp\!\!\!\perp \{P_{21}, \dots, P_{2(j-1)}, P_{2(j+1)}, \dots, P_{2m}\} | E, S_1$ .

**Theorem 2.** For  $MCP_D(\cdot | t_1, t_2, \alpha)$ , if assumption A2 holds,  $\lim_{n \rightarrow \infty} FDR \leq \alpha$ .

*Proof.* The  $MCP_D$  procedure is equivalent to the following two-step procedure, with  $MCP_D(\cdot | \alpha) = \{j : R_j = 1\}$ .

Step 1: Compute  $\mathcal{R} = \max\{r : \sum_{j \in \omega_{S_1} \cap \omega_{S_2}} 1[(P_{1j}, P_{2j}) \leq (\frac{r\alpha/2}{S_2}, \frac{r\alpha/2}{S_1})] = r\}$

Step 2: Define  $R_j = I[(P_{1j}, P_{2j}) \leq (\frac{\mathcal{R}\alpha/2}{S_2}, \frac{\mathcal{R}\alpha/2}{S_1}), j \in \omega_{S_1} \cap \omega_{S_2}]$

We need only show that  $\sum_{j \in \omega_0} E[R_j / \max(\mathcal{R}, 1)] \leq \alpha$ .

Let us start by defining  $T_i^j$  and  $C_r^{(j)}$ .

$$T_i^j = \max\left\{\frac{(\sum_{k \neq j} 1[P_{2k} < t_2] + 1)P_{1i}}{\alpha/2}, \frac{(\sum_{k \neq j} 1[P_{1k} < t_1] + 1)P_{2i}}{\alpha/2}\right\} \quad (5)$$

if  $(P_{1i}, P_{2i}) < (t_1, t_2)$ ,  $\infty$  & otherwise. Order and relabel the  $T_i^j$ s so  $T_2^j \leq \dots \leq T_m^j$  and define

$$C_r^{(j)} = \{[T_1^j, \dots, T_{j-1}^j, T_{j+1}^j, \dots, T_m^j] : T_r^j \leq r \text{ and } T_k^j > k \text{ for } k > r\}$$

Assume that  $\beta_j = 0$ . Then

$$\begin{aligned}
E\left[\frac{R_j}{\max(\mathcal{R}, 1)} \mid S_2, E, P_{2j}\right] &= \\
\sum_{r=1}^m \frac{1}{r} P\left[P_{1j} < \min\left(\frac{r\alpha/2}{S_2}, t_1\right), P_{2j} < \min\left(\frac{r\alpha/2}{S_1}, t_2\right), C_r^{(j)} \mid S_2, E, P_{2j}\right] & \\
\leq \sum_{r=1}^m \frac{1}{r} P\left[P_{1j} < \min\left(\frac{r\alpha/2}{S_2}, t_1\right), C_r^{(j)} \mid S_2, E, P_{2j}\right] 1[P_{2j} \leq t_2] & \\
\approx \sum_{r=1}^m \frac{1}{r} \frac{r\alpha/2}{S_2} P\left[C_r^{(j)} \mid S_2, E, P_{2j}\right] 1[P_{2j} \leq t_2] & \\
= \frac{\alpha/2}{S_2} \left(\sum_{r=1}^m P\left[C_r^{(j)} \mid S_2, E, P_{2j}\right]\right) 1[P_{2j} \leq t_2] & \\
= \frac{\alpha/2}{S_2} 1[P_{2j} \leq t_2] &
\end{aligned}$$

where the approximation uses the independence of  $P_{1j}$  and  $\{C_r^{(j)}, S_2, E, P_{2j}\}$  which holds by assumption A2 and can be made precise by the Berry-Esseen theorem. Similarly, we can show that for  $\gamma_j = 0$

$$E\left[\frac{R_j}{\max(\mathcal{R}, 1)} \mid S_1, E, P_{1j}\right] \approx \frac{\alpha/2}{S_1} 1[P_{1j} \leq t_1]$$

Therefore

$$\begin{aligned}
\sum_{j \in \omega_\emptyset} E\left[\frac{R_j}{\max(\mathcal{R}, 1)}\right] &= \sum_{j \in \omega_0} E\left[\frac{R_j}{\max(\mathcal{R}, 1)}\right] + \sum_{j \in \omega_{10}} E\left[\frac{R_j}{\max(\mathcal{R}, 1)}\right] \leq \\
\frac{\alpha}{2} E\left[\frac{\sum_{j \in \omega_0} 1[P_{2j} \leq t_2]}{S_2}\right] &+ \frac{\alpha}{2} E\left[\frac{\sum_{j \in \omega_{10}} 1[P_{1j} \leq t_1]}{S_1}\right] \leq \alpha
\end{aligned}$$

□

# 1 Supplementary Material: FWER and Power

| $m_{00}$ | $m_{10}$ | $m_{01}$ | $m_{11}$ | $MCP_B$ | $MCP_P$ | $MCP_S$ | $MCP_S^{WY}$ | $MCP_S^{MV}$ |
|----------|----------|----------|----------|---------|---------|---------|--------------|--------------|
| 110      | 0        | 0        | 0        | 0.00    | 0.03    | 0.01    | 0.02         | 0.01         |
| 95       | 15       | 0        | 0        | 0.00    | 0.04    | 0.02    | 0.02         | 0.02         |
| 70       | 40       | 0        | 0        | 0.01    | 0.08    | 0.02    | 0.02         | 0.02         |
| 95       | 0        | 15       | 0        | 0.01    | 0.06    | 0.02    | 0.02         | 0.03         |
| 80       | 15       | 15       | 0        | 0.01    | 0.04    | 0.02    | 0.02         | 0.03         |
| 55       | 40       | 15       | 0        | 0.01    | 0.04    | 0.02    | 0.03         | 0.04         |
| 1010     | 0        | 0        | 0        | 0.00    | 0.02    | 0.00    | 0.00         | 0.00         |
| 995      | 15       | 0        | 0        | 0.00    | 0.04    | 0.01    | 0.01         | 0.01         |
| 700      | 310      | 0        | 0        | 0.01    | 0.05    | 0.02    | 0.02         | 0.03         |
| 995      | 0        | 15       | 0        | 0.00    | 0.05    | 0.00    | 0.01         | 0.02         |
| 980      | 15       | 15       | 0        | 0.00    | 0.02    | 0.01    | 0.01         | 0.02         |
| 685      | 310      | 15       | 0        | 0.00    | 0.05    | 0.01    | 0.02         | 0.05         |

Table 1: FWER for continuous outcomes with correlation = 0.5. We compared the performance of five multiple comparison procedures:  $MCP_B$ ,  $MCP_P$ ,  $MCP_S$ ,  $MCP_S^{WY}$ , and  $MCP_S^{MV}$  using simulations when the outcome is continuous. The first four columns show the number ( $m_{00}$ ) of biomarkers associated with neither exposure nor outcome, the number ( $m_{10}$ ) associated with only the exposure, the number ( $m_{01}$ ) associated with only the outcome, and the number ( $m_{11}$ ) associated with both exposure and outcome. The remaining columns show the FWER, defined to be the mean proportion of simulations with at least one biomarker identified as a mediator, when  $\alpha = 0.05$ . Details of the simulation can be found in the methods section.

| $m_{00}$ | $m_{10}$ | $m_{01}$ | $m_{11}$ | $MCP_B$ | $MCP_P$ | $MCP_S$ | $MCP_S^{WY}$ | $MCP_S^{MV}$ |
|----------|----------|----------|----------|---------|---------|---------|--------------|--------------|
| 100      | 0        | 0        | 10       | 0.69    | 0.78    | 0.82    | 0.82         | 0.85         |
| 85       | 15       | 0        | 10       | 0.69    | 0.76    | 0.81    | 0.82         | 0.85         |
| 60       | 40       | 0        | 10       | 0.68    | 0.73    | 0.80    | 0.80         | 0.84         |
| 85       | 0        | 15       | 10       | 0.68    | 0.72    | 0.72    | 0.72         | 0.78         |
| 70       | 15       | 15       | 10       | 0.68    | 0.71    | 0.72    | 0.72         | 0.79         |
| 45       | 40       | 15       | 10       | 0.68    | 0.69    | 0.70    | 0.70         | 0.78         |
| 1000     | 0        | 0        | 10       | 0.28    | 0.69    | 0.61    | 0.61         | 0.78         |
| 985      | 15       | 0        | 10       | 0.28    | 0.60    | 0.58    | 0.58         | 0.76         |
| 690      | 310      | 0        | 10       | 0.27    | 0.35    | 0.45    | 0.46         | 0.68         |
| 985      | 0        | 15       | 10       | 0.27    | 0.56    | 0.49    | 0.49         | 0.77         |
| 970      | 15       | 15       | 10       | 0.27    | 0.53    | 0.45    | 0.46         | 0.75         |
| 675      | 310      | 15       | 10       | 0.27    | 0.34    | 0.36    | 0.37         | 0.75         |

Table 2: Power for continuous outcomes with correlation = 0.5. We compared the performance of five multiple comparison procedures:  $MCP_B$ ,  $MCP_P$ ,  $MCP_S$ ,  $MCP_S^{WY}$ , and  $MCP_S^{MV}$  using simulations when the outcome is continuous. The first four columns show the number ( $m_{00}$ ) of biomarkers associated with neither exposure nor outcome, the number ( $m_{10}$ ) associated with only the exposure, the number ( $m_{01}$ ) associated with only the outcome, and the number ( $m_{11}$ ) associated with both exposure and outcome. The remaining columns show the power, defined to be the mean proportion of true mediators identified, when  $\alpha = 0.05$ . Details of the simulation can be found in the methods section.



| $m_{00}$ | $m_{10}$ | $m_{01}$ | $m_{11}$ | $MCP_B$ | $MCP_P$ | $MCP_S$ | $MCP_S^{WY}$ | $MCP_S^{MV}$ |
|----------|----------|----------|----------|---------|---------|---------|--------------|--------------|
| 110      | 0        | 0        | 0        | 0.00    | 0.02    | 0.00    | 0.11         | 0.01         |
| 95       | 15       | 0        | 0        | 0.00    | 0.04    | 0.01    | 0.02         | 0.01         |
| 70       | 40       | 0        | 0        | 0.01    | 0.08    | 0.01    | 0.03         | 0.01         |
| 95       | 0        | 15       | 0        | 0.01    | 0.06    | 0.02    | 0.03         | 0.03         |
| 80       | 15       | 15       | 0        | 0.01    | 0.04    | 0.01    | 0.02         | 0.03         |
| 55       | 40       | 15       | 0        | 0.02    | 0.04    | 0.03    | 0.04         | 0.03         |
| 1010     | 0        | 0        | 0        | 0.00    | 0.02    | 0.00    | 0.00         | 0.00         |
| 995      | 15       | 0        | 0        | 0.00    | 0.04    | 0.01    | 0.01         | 0.01         |
| 700      | 310      | 0        | 0        | 0.00    | 0.04    | 0.01    | 0.03         | 0.01         |
| 995      | 0        | 15       | 0        | 0.00    | 0.06    | 0.00    | 0.02         | 0.02         |
| 980      | 15       | 15       | 0        | 0.00    | 0.05    | 0.00    | 0.02         | 0.03         |
| 685      | 310      | 15       | 0        | 0.01    | 0.06    | 0.02    | 0.04         | 0.03         |

Table 3: FWER for continuous outcomes with correlation = 0.9. We compared the performance of five multiple comparison procedures:  $MCP_B$ ,  $MCP_P$ ,  $MCP_S$ ,  $MCP_S^{WY}$ , and  $MCP_S^{MV}$  using simulations when the outcome is continuous. The first four columns show the number ( $m_{00}$ ) of biomarkers associated with neither exposure nor outcome, the number ( $m_{10}$ ) associated with only the exposure, the number ( $m_{01}$ ) associated with only the outcome, and the number ( $m_{11}$ ) associated with both exposure and outcome. The remaining columns show the FWER, defined to be the mean proportion of simulations with at least one biomarker identified as a mediator, when  $\alpha = 0.05$ . Details of the simulation can be found in the methods section.

| $m_{00}$ | $m_{10}$ | $m_{01}$ | $m_{11}$ | $MCP_B$ | $MCP_P$ | $MCP_S$ | $MCP_S^{WY}$ | $MCP_S^{MV}$ |
|----------|----------|----------|----------|---------|---------|---------|--------------|--------------|
| 100      | 0        | 0        | 10       | 0.72    | 0.84    | 0.84    | 0.84         | 0.85         |
| 85       | 15       | 0        | 10       | 0.72    | 0.84    | 0.84    | 0.84         | 0.85         |
| 60       | 40       | 0        | 10       | 0.71    | 0.83    | 0.83    | 0.84         | 0.85         |
| 85       | 0        | 15       | 10       | 0.71    | 0.84    | 0.84    | 0.84         | 0.85         |
| 70       | 15       | 15       | 10       | 0.71    | 0.84    | 0.84    | 0.84         | 0.85         |
| 45       | 40       | 15       | 10       | 0.71    | 0.83    | 0.83    | 0.83         | 0.84         |
| 1000     | 0        | 0        | 10       | 0.28    | 0.69    | 0.62    | 0.68         | 0.81         |
| 985      | 15       | 0        | 10       | 0.28    | 0.60    | 0.58    | 0.63         | 0.78         |
| 690      | 310      | 0        | 10       | 0.27    | 0.43    | 0.45    | 0.54         | 0.69         |
| 985      | 0        | 15       | 10       | 0.27    | 0.49    | 0.45    | 0.56         | 0.76         |
| 970      | 15       | 15       | 10       | 0.28    | 0.49    | 0.42    | 0.52         | 0.76         |
| 675      | 310      | 15       | 10       | 0.26    | 0.39    | 0.32    | 0.45         | 0.76         |

Table 4: Power for continuous outcomes with correlation = 0.9. We compared the performance of five multiple comparison procedures:  $MCP_B$ ,  $MCP_P$ ,  $MCP_S$ ,  $MCP_S^{WY}$ , and  $MCP_S^{MV}$  using simulations when the outcome is continuous. The first four columns show the number ( $m_{00}$ ) of biomarkers associated with neither exposure nor outcome, the number ( $m_{10}$ ) associated with only the exposure, the number ( $m_{01}$ ) associated with only the outcome, and the number ( $m_{11}$ ) associated with both exposure and outcome. The remaining columns show the power, defined to be the mean proportion of true mediators identified, when  $\alpha = 0.05$ . Details of the simulation can be found in the methods section.

| $m_{00}$ | $m_{10}$ | $m_{01}$ | $m_{11}$ | $MCP_B$ | $MCP_P$ | $MCP_S$ | $MCP_S^{WY}$ | $MCP_S^{MV}$ |
|----------|----------|----------|----------|---------|---------|---------|--------------|--------------|
| 110      | 0        | 0        | 0        | 0.00    | 0.03    | 0.02    | 0.04         | 0.02         |
| 95       | 15       | 0        | 0        | 0.00    | 0.03    | 0.03    | 0.03         | 0.03         |
| 70       | 40       | 0        | 0        | 0.01    | 0.06    | 0.02    | 0.02         | 0.02         |
| 95       | 0        | 15       | 0        | 0.01    | 0.06    | 0.01    | 0.02         | 0.03         |
| 80       | 15       | 15       | 0        | 0.01    | 0.05    | 0.03    | 0.03         | 0.05         |
| 55       | 40       | 15       | 0        | 0.01    | 0.05    | 0.02    | 0.03         | 0.04         |
| 1010     | 0        | 0        | 0        | 0.00    | 0.02    | 0.00    | 0.00         | 0.00         |
| 995      | 15       | 0        | 0        | 0.00    | 0.05    | 0.00    | 0.01         | 0.01         |
| 700      | 310      | 0        | 0        | 0.01    | 0.04    | 0.02    | 0.02         | 0.02         |
| 995      | 0        | 15       | 0        | 0.00    | 0.05    | 0.00    | 0.00         | 0.01         |
| 980      | 15       | 15       | 0        | 0.00    | 0.05    | 0.01    | 0.01         | 0.01         |
| 685      | 310      | 15       | 0        | 0.01    | 0.07    | 0.02    | 0.02         | 0.04         |

Table 5: FWER for binary outcomes with correlation = 0.5. We compared the performance of five multiple comparison procedures:  $MCP_B$ ,  $MCP_P$ ,  $MCP_S$ ,  $MCP_S^{WY}$ , and  $MCP_S^{MV}$  using simulations when the outcome is continuous. The first four columns show the number ( $m_{00}$ ) of biomarkers associated with neither exposure nor outcome, the number ( $m_{10}$ ) associated with only the exposure, the number ( $m_{01}$ ) associated with only the outcome, and the number ( $m_{11}$ ) associated with both exposure and outcome. The remaining columns show the FWER, defined to be the mean proportion of simulations with at least one biomarker identified as a mediator, when  $\alpha = 0.05$ . Details of the simulation can be found in the methods section.

| $m_{00}$ | $m_{10}$ | $m_{01}$ | $m_{11}$ | $MCP_B$ | $MCP_P$ | $MCP_S$ | $MCP_S^{WY}$ | $MCP_S^{MV}$ |
|----------|----------|----------|----------|---------|---------|---------|--------------|--------------|
| 100      | 0        | 0        | 10       | 0.49    | 0.65    | 0.69    | 0.70         | 0.80         |
| 85       | 15       | 0        | 10       | 0.50    | 0.57    | 0.64    | 0.65         | 0.79         |
| 60       | 40       | 0        | 10       | 0.51    | 0.51    | 0.59    | 0.60         | 0.77         |
| 85       | 0        | 15       | 10       | 0.49    | 0.60    | 0.62    | 0.62         | 0.78         |
| 70       | 15       | 15       | 10       | 0.49    | 0.54    | 0.57    | 0.57         | 0.77         |
| 45       | 40       | 15       | 10       | 0.49    | 0.49    | 0.53    | 0.54         | 0.77         |
| 1000     | 0        | 0        | 10       | 0.10    | 0.48    | 0.35    | 0.36         | 0.45         |
| 985      | 15       | 0        | 10       | 0.10    | 0.37    | 0.31    | 0.32         | 0.41         |
| 690      | 310      | 0        | 10       | 0.10    | 0.14    | 0.18    | 0.19         | 0.23         |
| 985      | 0        | 15       | 10       | 0.10    | 0.42    | 0.30    | 0.31         | 0.60         |
| 970      | 15       | 15       | 10       | 0.10    | 0.34    | 0.27    | 0.28         | 0.59         |
| 675      | 310      | 15       | 10       | 0.10    | 0.15    | 0.16    | 0.17         | 0.39         |

Table 6: Power for binary outcomes with correlation = 0.5. We compared the performance of five multiple comparison procedures:  $MCP_B$ ,  $MCP_P$ ,  $MCP_S$ ,  $MCP_S^{WY}$ , and  $MCP_S^{MV}$  using simulations when the outcome is continuous. The first four columns show the number ( $m_{00}$ ) of biomarkers associated with neither exposure nor outcome, the number ( $m_{10}$ ) associated with only the exposure, the number ( $m_{01}$ ) associated with only the outcome, and the number ( $m_{11}$ ) associated with both exposure and outcome. The remaining columns show the power, defined to be the mean proportion of true mediators identified, when  $\alpha = 0.05$ . Details of the simulation can be found in the methods section.

| $m_{00}$ | $m_{10}$ | $m_{01}$ | $m_{11}$ | $MCP_B$ | $MCP_P$ | $MCP_S$ | $MCP_S^{WY}$ | $MCP_S^{MV}$ |
|----------|----------|----------|----------|---------|---------|---------|--------------|--------------|
| 110      | 0        | 0        | 0        | 0.00    | 0.02    | 0.00    | 0.11         | 0.01         |
| 95       | 15       | 0        | 0        | 0.00    | 0.05    | 0.01    | 0.01         | 0.01         |
| 70       | 40       | 0        | 0        | 0.01    | 0.07    | 0.02    | 0.03         | 0.02         |
| 95       | 0        | 15       | 0        | 0.01    | 0.06    | 0.02    | 0.03         | 0.03         |
| 80       | 15       | 15       | 0        | 0.01    | 0.04    | 0.03    | 0.04         | 0.02         |
| 55       | 40       | 15       | 0        | 0.01    | 0.03    | 0.01    | 0.02         | 0.03         |
| 1010     | 0        | 0        | 0        | 0.00    | 0.02    | 0.00    | 0.00         | 0.00         |
| 995      | 15       | 0        | 0        | 0.00    | 0.05    | 0.01    | 0.02         | 0.00         |
| 700      | 310      | 0        | 0        | 0.01    | 0.03    | 0.01    | 0.01         | 0.01         |
| 995      | 0        | 15       | 0        | 0.00    | 0.04    | 0.00    | 0.01         | 0.01         |
| 980      | 15       | 15       | 0        | 0.00    | 0.04    | 0.01    | 0.02         | 0.02         |
| 685      | 310      | 15       | 0        | 0.00    | 0.06    | 0.01    | 0.01         | 0.01         |

Table 7: FWER for binary outcomes with correlation = 0.9. We compared the performance of five multiple comparison procedures:  $MCP_B$ ,  $MCP_P$ ,  $MCP_S$ ,  $MCP_S^{WY}$ , and  $MCP_S^{MV}$  using simulations when the outcome is continuous. The first four columns show the number ( $m_{00}$ ) of biomarkers associated with neither exposure nor outcome, the number ( $m_{10}$ ) associated with only the exposure, the number ( $m_{01}$ ) associated with only the outcome, and the number ( $m_{11}$ ) associated with both exposure and outcome. The remaining columns show the FWER, defined to be the mean proportion of simulations with at least one biomarker identified as a mediator, when  $\alpha = 0.05$ . Details of the simulation can be found in the methods section.

| $m_{00}$ | $m_{10}$ | $m_{01}$ | $m_{11}$ | $MCP_B$ | $MCP_P$ | $MCP_S$ | $MCP_S^{WY}$ | $MCP_S^{MV}$ |
|----------|----------|----------|----------|---------|---------|---------|--------------|--------------|
| 100      | 0        | 0        | 10       | 0.69    | 0.79    | 0.82    | 0.83         | 0.85         |
| 85       | 15       | 0        | 10       | 0.69    | 0.77    | 0.82    | 0.83         | 0.85         |
| 60       | 40       | 0        | 10       | 0.68    | 0.74    | 0.80    | 0.81         | 0.85         |
| 85       | 0        | 15       | 10       | 0.68    | 0.78    | 0.83    | 0.83         | 0.85         |
| 70       | 15       | 15       | 10       | 0.68    | 0.76    | 0.82    | 0.82         | 0.85         |
| 45       | 40       | 15       | 10       | 0.68    | 0.75    | 0.80    | 0.81         | 0.84         |
| 1000     | 0        | 0        | 10       | 0.11    | 0.48    | 0.36    | 0.43         | 0.48         |
| 985      | 15       | 0        | 10       | 0.10    | 0.37    | 0.32    | 0.37         | 0.43         |
| 690      | 310      | 0        | 10       | 0.10    | 0.20    | 0.18    | 0.25         | 0.23         |
| 985      | 0        | 15       | 10       | 0.10    | 0.36    | 0.27    | 0.36         | 0.62         |
| 970      | 15       | 15       | 10       | 0.11    | 0.33    | 0.24    | 0.31         | 0.60         |
| 675      | 310      | 15       | 10       | 0.11    | 0.21    | 0.14    | 0.22         | 0.42         |

Table 8: Power for binary outcomes with correlation = 0.9. We compared the performance of five multiple comparison procedures:  $MCP_B$ ,  $MCP_P$ ,  $MCP_S$ ,  $MCP_S^{WY}$ , and  $MCP_S^{MV}$  using simulations when the outcome is continuous. The first four columns show the number ( $m_{00}$ ) of biomarkers associated with neither exposure nor outcome, the number ( $m_{10}$ ) associated with only the exposure, the number ( $m_{01}$ ) associated with only the outcome, and the number ( $m_{11}$ ) associated with both exposure and outcome. The remaining columns show the power, defined to be the mean proportion of true mediators identified, when  $\alpha = 0.05$ . Details of the simulation can be found in the methods section.

## 2 Supplementary Material: FDR

| $m_{00}$ | $m_{10}$ | $m_{01}$ | $m_{11}$ | $MCP_D$ | $MCP_D^{MV}$ |
|----------|----------|----------|----------|---------|--------------|
| 100      | 0        | 0        | 10       | 0.01    | 0.00         |
| 85       | 15       | 0        | 10       | 0.05    | 0.02         |
| 60       | 40       | 0        | 10       | 0.08    | 0.04         |
| 85       | 0        | 15       | 10       | 0.04    | 0.03         |
| 70       | 15       | 15       | 10       | 0.07    | 0.03         |
| 45       | 40       | 15       | 10       | 0.11    | 0.03         |
| 1000     | 0        | 0        | 10       | 0.05    | 0.02         |
| 985      | 15       | 0        | 10       | 0.07    | 0.03         |
| 690      | 310      | 0        | 10       | 0.09    | 0.08         |
| 985      | 0        | 15       | 10       | 0.08    | 0.03         |
| 970      | 15       | 15       | 10       | 0.10    | 0.04         |
| 675      | 310      | 15       | 10       | 0.12    | 0.04         |

Table 9: FDR for continuous outcomes with correlation = 0. We compared the performance of two multiple comparison procedures:  $MCP_D$ , and  $MCP_D^{MV}$  using simulations when the outcome is continuous and the conditional correlation between metabolites in the same block is 0. The first four columns show the number ( $m_{00}$ ) of biomarkers associated with neither exposure or outcome, the number ( $m_{10}$ ) associated with only the exposure, the number ( $m_{01}$ ) associated with only the outcome, and the number ( $m_{11}$ ) associated with both exposure and outcome. The remaining columns show the FDR when  $\alpha = 0.2$ . Details of the simulation can be found in the methods section.

| $m_{00}$ | $m_{10}$ | $m_{01}$ | $m_{11}$ | $MCP_D$ | $MCP_D^{MV}$ |
|----------|----------|----------|----------|---------|--------------|
| 100      | 0        | 0        | 10       | 0.01    | 0.01         |
| 85       | 15       | 0        | 10       | 0.05    | 0.03         |
| 60       | 40       | 0        | 10       | 0.07    | 0.04         |
| 85       | 0        | 15       | 10       | 0.03    | 0.03         |
| 70       | 15       | 15       | 10       | 0.07    | 0.04         |
| 45       | 40       | 15       | 10       | 0.10    | 0.04         |
| 1000     | 0        | 0        | 10       | 0.06    | 0.04         |
| 985      | 15       | 0        | 10       | 0.06    | 0.04         |
| 690      | 310      | 0        | 10       | 0.10    | 0.11         |
| 985      | 0        | 15       | 10       | 0.08    | 0.05         |
| 970      | 15       | 15       | 10       | 0.10    | 0.05         |
| 675      | 310      | 15       | 10       | 0.12    | 0.09         |

Table 10: FDR for binary outcomes with correlation = 0. We compared the performance of two multiple comparison procedures:  $MCP_D$  and  $MCP_D^{MV}$  using simulations when the outcome is binary and the conditional correlation between metabolites in the same block is 0. The first four columns show the number ( $m_{00}$ ) of biomarkers associated with neither exposure or outcome, the number ( $m_{10}$ ) associated with only the exposure, the number ( $m_{01}$ ) associated with only the outcome, and the number ( $m_{11}$ ) associated with both exposure and outcome. The remaining columns show the FDR when  $\alpha = 0.2$ . Details of the simulation can be found in the methods section.



| $m_{00}$ | $m_{10}$ | $m_{01}$ | $m_{11}$ | $MCP_D$ | $MCP_D^{MV}$ |
|----------|----------|----------|----------|---------|--------------|
| 100      | 0        | 0        | 10       | 0.01    | 0.00         |
| 85       | 15       | 0        | 10       | 0.04    | 0.01         |
| 60       | 40       | 0        | 10       | 0.08    | 0.02         |
| 85       | 0        | 15       | 10       | 0.07    | 0.03         |
| 70       | 15       | 15       | 10       | 0.10    | 0.03         |
| 45       | 40       | 15       | 10       | 0.13    | 0.03         |
| 1000     | 0        | 0        | 10       | 0.05    | 0.01         |
| 985      | 15       | 0        | 10       | 0.07    | 0.02         |
| 690      | 310      | 0        | 10       | 0.09    | 0.06         |
| 985      | 0        | 15       | 10       | 0.09    | 0.04         |
| 970      | 15       | 15       | 10       | 0.11    | 0.04         |
| 675      | 310      | 15       | 10       | 0.12    | 0.04         |

Table 11: FDR for continuous outcomes with correlation = 0.5. We compared the performance of two multiple comparison procedures:  $MCP_D$  and  $MCP_D^{MV}$  using simulations when the outcome is continuous and the conditional correlation between metabolites in the same block is 0.5. The first four columns show the number ( $m_{00}$ ) of biomarkers associated with neither exposure or outcome, the number ( $m_{10}$ ) associated with only the exposure, the number ( $m_{01}$ ) associated with only the outcome, and the number ( $m_{11}$ ) associated with both exposure and outcome. The remaining columns show the FDR when  $\alpha = 0.2$ . Details of the simulation can be found in the methods section.

| $m_{00}$ | $m_{10}$ | $m_{01}$ | $m_{11}$ | $MCP_D$ | $MCP_D^{MV}$ |
|----------|----------|----------|----------|---------|--------------|
| 100      | 0        | 0        | 10       | 0.01    | 0.00         |
| 85       | 15       | 0        | 10       | 0.04    | 0.01         |
| 60       | 40       | 0        | 10       | 0.08    | 0.04         |
| 85       | 0        | 15       | 10       | 0.06    | 0.02         |
| 70       | 15       | 15       | 10       | 0.09    | 0.03         |
| 45       | 40       | 15       | 10       | 0.12    | 0.03         |
| 1000     | 0        | 0        | 10       | 0.06    | 0.02         |
| 985      | 15       | 0        | 10       | 0.07    | 0.03         |
| 690      | 310      | 0        | 10       | 0.08    | 0.08         |
| 985      | 0        | 15       | 10       | 0.08    | 0.04         |
| 970      | 15       | 15       | 10       | 0.10    | 0.05         |
| 675      | 310      | 15       | 10       | 0.11    | 0.07         |

Table 12: FDR for continuous outcomes with correlation = 0.5. We compared the performance of two multiple comparison procedures:  $MCP_D$  and  $MCP_D^{MV}$  using simulations when the outcome is binary and the conditional correlation between metabolites in the same block is 0.5. The first four columns show the number ( $m_{00}$ ) of biomarkers associated with neither exposure or outcome, the number ( $m_{10}$ ) associated with only the exposure, the number ( $m_{01}$ ) associated with only the outcome, and the number ( $m_{11}$ ) associated with both exposure and outcome. The remaining columns show the FDR when  $\alpha = 0.2$ . Details of the simulation can be found in the methods section.

| $m_{00}$ | $m_{10}$ | $m_{01}$ | $m_{11}$ | $MCP_D$ | $MCP_D^{MV}$ |
|----------|----------|----------|----------|---------|--------------|
| 100      | 0        | 0        | 10       | 0.01    | 0.00         |
| 85       | 15       | 0        | 10       | 0.04    | 0.00         |
| 60       | 40       | 0        | 10       | 0.07    | 0.00         |
| 85       | 0        | 15       | 10       | 0.01    | 0.00         |
| 70       | 15       | 15       | 10       | 0.04    | 0.00         |
| 45       | 40       | 15       | 10       | 0.07    | 0.00         |
| 1000     | 0        | 0        | 10       | 0.03    | 0.01         |
| 985      | 15       | 0        | 10       | 0.06    | 0.01         |
| 690      | 310      | 0        | 10       | 0.07    | 0.02         |
| 985      | 0        | 15       | 10       | 0.08    | 0.04         |
| 970      | 15       | 15       | 10       | 0.10    | 0.03         |
| 675      | 310      | 15       | 10       | 0.12    | 0.04         |

Table 13: FDR for continuous outcomes with correlation = 0.9. We compared the performance of two multiple comparison procedures:  $MCP_D$  and  $MCP_D^{MV}$  using simulations when the outcome is continuous and the conditional correlation between metabolites in the same block is 0.9. The first four columns show the number ( $m_{00}$ ) of biomarkers associated with neither exposure or outcome, the number ( $m_{10}$ ) associated with only the exposure, the number ( $m_{01}$ ) associated with only the outcome, and the number ( $m_{11}$ ) associated with both exposure and outcome. The remaining columns show the FDR when  $\alpha = 0.2$ . Details of the simulation can be found in the methods section.

| $m_{00}$ | $m_{10}$ | $m_{01}$ | $m_{11}$ | $MCP_D$ | $MCP_D^{MV}$ |
|----------|----------|----------|----------|---------|--------------|
| 100      | 0        | 0        | 10       | 0.01    | 0.00         |
| 85       | 15       | 0        | 10       | 0.04    | 0.00         |
| 60       | 40       | 0        | 10       | 0.07    | 0.01         |
| 85       | 0        | 15       | 10       | 0.01    | 0.00         |
| 70       | 15       | 15       | 10       | 0.03    | 0.00         |
| 45       | 40       | 15       | 10       | 0.08    | 0.00         |
| 1000     | 0        | 0        | 10       | 0.04    | 0.01         |
| 985      | 15       | 0        | 10       | 0.06    | 0.01         |
| 690      | 310      | 0        | 10       | 0.06    | 0.02         |
| 985      | 0        | 15       | 10       | 0.07    | 0.04         |
| 970      | 15       | 15       | 10       | 0.09    | 0.05         |
| 675      | 310      | 15       | 10       | 0.10    | 0.05         |

Table 14: FDR for binary outcomes with correlation = 0.9. We compared the performance of two multiple comparison procedures:  $MCP_D$  and  $MCP_D^{MV}$  using simulations when the outcome is binary and the conditional correlation between metabolites in the same block is 0.9. The first four columns show the number ( $m_{00}$ ) of biomarkers associated with neither exposure or outcome, the number ( $m_{10}$ ) associated with only the exposure, the number ( $m_{01}$ ) associated with only the outcome, and the number ( $m_{11}$ ) associated with both exposure and outcome. The remaining columns show the FDR when  $\alpha = 0.2$ . Details of the simulation can be found in the methods section.
